# Supplementary material
Source: publisher figshare collection journal article supplement (https://frontiersin.figshare.com/ndownloader/files/32584970)
Supplement: Supplementary file 1 [file 32584970]

Table A4: Overview over wood density, wood nitrogen and carbon content, C/N ratio, CWD and FWD carbon and number of samples for the 66 study plots.

| % in wood samples | | | |  | Carbon pool (Mg C ha-1) | | samples |
| --- | --- | --- | --- | --- | --- | --- | --- |
| Plot | Wood density±SE (Mg/m-3) | Carbon | Nitrogen | C/N_Ratio | CWD.C | FWD.C |  |
| SAV1 | NA | NA | NA | NA | NA | NA | 0 |
| SAV2 | NA | 48.52 | 0.20 | 247.9 | 0.04 | 0.15 | 1 |
| SAV3 | NA | NA | NA | NA | NA | NA | 0 |
| SAV4 | NA | NA | NA | NA | NA | NA | 0 |
| SAV5 | NA | NA | NA | NA | NA | NA | 0 |
| MAI1 | NA | NA | NA | NA | NA | NA | 0 |
| MAI2 | NA | NA | NA | NA | NA | NA | 0 |
| MAI3 | NA | NA | NA | NA | NA | NA | 0 |
| MAI4 | NA | NA | NA | NA | NA | NA | 0 |
| MAI5 | NA | NA | NA | NA | NA | NA | 0 |
| FLM1 | 0.37 (0.028) | 49.08 | 0.31 | 236.2 | 8.55 | 4.51 | 9 |
| FLM2 | 0.32 (0.029) | 48.88 | 0.26 | 223.8 | 5.68 | 2.21 | 10 |
| FLM3 | 0.31 (0.027) | 47.24 | 0.36 | 150.6 | 8.70 | 2.28 | 10 |
| FLM4 | 0.44 (0.016) | 47.49 | 0.26 | 225.4 | 13.26 | 3.26 | 10 |
| FLM6 | 0.25 (0.014) | 49.93 | 0.45 | 134.8 | 5.97 | 1.42 | 12 |
| HOM1 | 0.36 (0.042) | 45.08 | 0.43 | 170.3 | 3.37 | 1.03 | 8 |
| HOM2 | 0.52 (NA) | 40.67 | 0.46 | 96.2 | 0.95 | 0.74 | 1 |
| HOM3 | 0.37 (NA) | 46.51 | 0.45 | 113.9 | 0.46 | 1.05 | 5 |
| HOM4 | NA | NA | NA | NA | NA | NA | 0 |
| HOM5 | 0.20 (0.084) | NA | NA | NA | NA | NA | 5 |
| COF1 | NA | NA | NA | NA | NA | NA | 0 |
| COF2 | NA | NA | NA | NA | NA | NA | 0 |
| COF3 | NA | NA | NA | NA | NA | NA | 0 |
| COF4 | NA | NA | NA | NA | NA | NA | 0 |
| COF5 | NA | NA | NA | NA | NA | NA | 0 |
| COF6 | NA | NA | NA | NA | NA | NA | 0 |
| GRA1 | NA | NA | NA | NA | NA | NA | 0 |
| GRA2 | NA | NA | NA | NA | NA | NA | 0 |
| GRA4 | NA | NA | NA | NA | NA | NA | 0 |
| GRA5 | NA | NA | NA | NA | NA | NA | 0 |
| GRA6 | NA | NA | NA | NA | NA | NA | 0 |
| FOC1 | 0.31 (0.038) | 49.34 | 0.43 | 140.9 | 1.53 | 3.97 | 9 |
| FOC2 | 0.29 (0.029) | 48.22 | 0.38 | 188.9 | 5.33 | 12.33 | 10 |
| FOC3 | 0.38 (0.028) | 48.51 | 0.22 | 226.1 | 42.42 | 8.68 | 8 |
| FOC4 | 0.33 (0.015) | 48.30 | 0.24 | 246.5 | 31.18 | 9.95 | 10 |
| FOC5 | 0.33 (0.017) | 48.50 | 0.21 | 262.2 | 15.71 | 2.00 | 10 |
| FOD1 | 0.38 (0.024) | 49.68 | 0.36 | 176.3 | 54.34 | 4.04 | 10 |
| FOD2 | 0.34 (0.025) | 48.71 | 0.31 | 164.4 | 27.17 | 5.48 | 9 |
| FOD3 | 0.34 (0.017) | 47.29 | 0.24 | 228.7 | 97.73 | 2.23 | 10 |

| FOD4 | 0.25 (0.012) | 49.47 | 0.58 | 113.1 | 4.17 | 1.93 | 10 |  |  |  |  |  |  |
| --- | --- | --- | --- | --- | --- | --- | --- | --- | --- | --- | --- | --- | --- |
| FOD5 | 0.23 (0.020) | 49.14 | 0.30 | 186.8 | 6.29 | 1.23 | 10 |  |  |  |  |  |  |
| FPO1 | 0.36 (0.021) | 50.28 | 0.24 | 307.5 | 22.86 | 3.06 | 10 |  |  |  |  |  |  |
| FPO2 | 0.33 (0.008) | 48.35 | 0.25 | 219.0 | 17.79 | 2.13 | 13 |  |  |  |  |  |  |
| FPO3 | 0.34 (0.007) | 48.72 | 0.44 | 183.0 | 11.86 | 4.04 | 10 |  |  |  |  |  |  |
| FPO4 | 0.36 (0.032) | 48.82 | 0.16 | 410.8 | 2.86 | 1.93 | 10 |  |  |  |  |  |  |
| FPO5 | NA | 47.56 | 0.17 | 297.9 | 0.95 | 1.17 | 0 |  |  |  |  |  |  |
| FPD1 | 0.25 (0.056) | 51.11 | 0.21 | 250.0 | 8.85 | 2.18 | 3 |  |  |  |  |  |  |
| FPD2 | 0.36 (0.013) | 47.90 | 0.21 | 269.8 | 3.54 | 2.42 | 11 |  |  |  |  |  |  |
| FPD3 | 0.36 (0.027) | 48.92 | 0.21 | 329.9 | 0.70 | 1.96 | 10 |  |  |  |  |  |  |
| FPD4 | 0.28 (0.044) | 49.60 | 0.27 | 209.5 | 0.30 | 3.31 | 7 |  |  |  |  |  |  |
| FPD5 | 0.31 (0.027) | 48.53 | 0.20 | 255.7 | 1.06 | 1.85 | 9 |  |  |  |  |  |  |
| FER0 | 0.29 (0.023) | 51.31 | 0.45 | 203.9 | 0.54 | 1.95 | 5 |  |  |  |  |  |  |
| FER1 | 0.29 (0.060) | 51.44 | 0.37 | 144.3 | 0.48 | 5.14 | 3 |  |  |  |  |  |  |
| FER2 | 0.26 (0.076) | 50.18 | 0.50 | 143.6 | 0.12 | 1.80 | 2 |  |  |  |  |  |  |
| FER3 | 0.37 (0.025) | 48.65 | 0.14 | 367.0 | 0.20 | 4.87 | 3 |  |  |  |  |  |  |
| FER4 | 0.23 (0.029) | 49.51 | 0.42 | 123.5 | 0.25 | 2.55 | 2 |  |  |  |  |  |  |
| FED1 | NA | NA | NA | NA | NA | NA | 0 |  |  |  |  |  |  |
| FED2 | 0.38 (0.065) | 48.59 | 0.24 | 216.9 | 0.13 | 1.53 | 3 |  |  |  |  |  |  |
| FED3 | NA | NA | NA | NA | NA | NA | 0 |  |  |  |  |  |  |
| FED4 | NA | NA | NA | NA | NA | NA | 0 |  |  |  |  |  |  |
| FED5 | NA | NA | NA | NA | NA | NA | 0 |  |  |  |  |  |  |
| HEL1 | NA | NA | NA | NA | NA | NA | 0 |  |  |  |  |  |  |
| HEL2 | NA | NA | NA | NA | NA | NA | 0 |  |  |  |  |  |  |
| HEL3 | NA | NA | NA | NA | NA | NA | 0 |  |  |  |  |  |  |
| HEL4 | NA | NA | NA | NA | NA | NA | 0 |  |  |  |  |  |  |

*Notes:* The values in this table belong to the same plots, described in table A3. Wood density, C- and N-content were measured in CWD samples. Carbon pool refers to the total amount of C stored in each plot and component (CWD and FWD).
